# Supplementary material for: Age Gelation in Direct Steam Infusion Ultra-High-Temperature Milk: Different Heat Treatments Produce Different Gels
Source: MDPI journal article supplement (doi:10.3390/foods13081236), 2024-04-18
Supplement: s1 [file s1]

Table S1. Heating conditions and storage temperatures of all samples

| Sample <sup>1</sup> | Preheating condition | direct UHT temperature (°C) | Heating time (s) | C*   | Direct system  | Storage temperature (°C) |
|---------------------|----------------------|-----------------------------|------------------|------|----------------|--------------------------|
| Raw                 | — —                  | — —                         | — —              |      | — —            |                          |
| 1                   |                      | 153                         | 0.25             | 0.03 |                |                          |
| 2                   |                      | 147                         | 0.25             | 0.02 |                |                          |
| 3                   |                      | 142                         | 0.25             | 0.01 |                |                          |
| 4                   |                      | 157                         | 0.116            | 0.02 |                |                          |
| 5                   | 75°C/25 s            | 153                         | 0.116            | 0.01 | Steam infusion | 4, 25, 37                |
| 6                   |                      | 147                         | 6                | 0.47 |                |                          |
| 7                   |                      | 142                         | 6                | 0.33 |                |                          |
| 8                   |                      | 147                         | 3                | 0.24 |                |                          |
| 9                   |                      | 142                         | 3                | 0.16 |                |                          |
| 10                  |                      | 153                         | 3                | 0.37 |                |                          |

<sup>1</sup>The sample number in the table was the batch of samples in the factory.

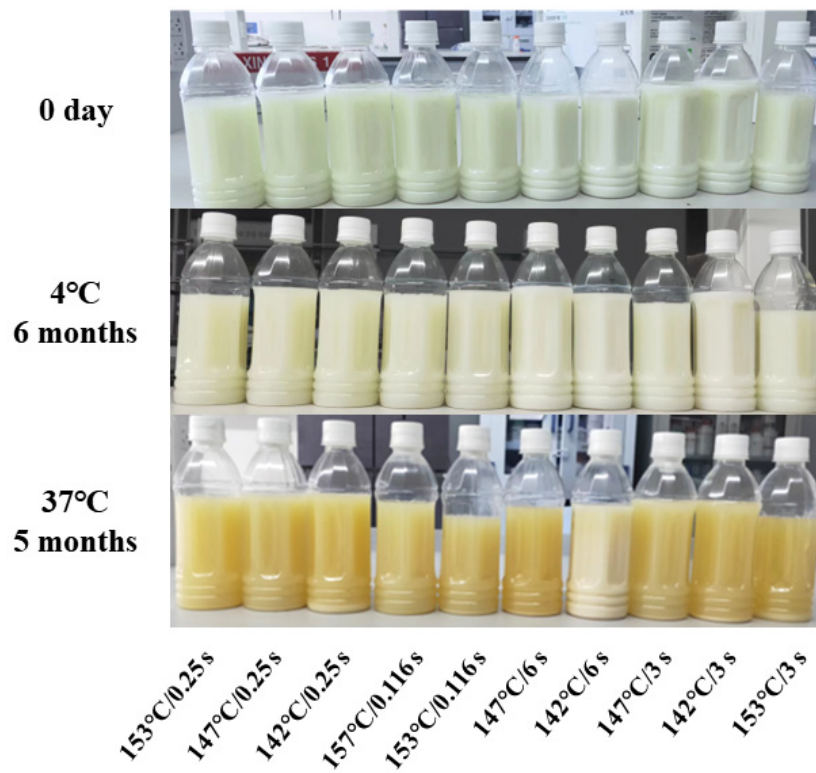

Figure S1. Sedimentation in all samples during the later period of storage
